# Supplementary material
Source: Springer Nature journal article supplement (https://www.springermedizin.de/resource/supplementary/12916_2011_441_MOESM2_ESM.pdf/9599966)

Rate n/1000

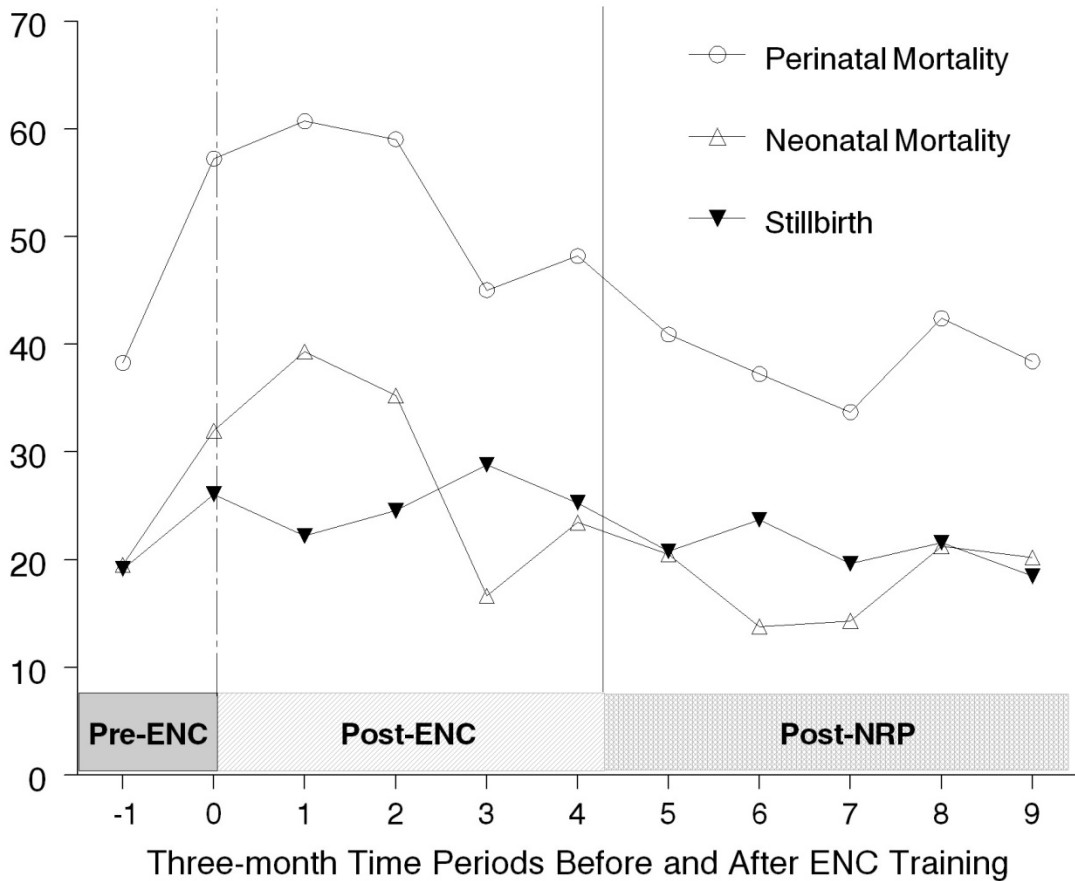

Supplement: MOESM2 [file 9599966]
